# Supplementary material
Source: Springer Nature journal article supplement (https://www.springermedizin.de/resource/supplementary/13618_2012_46_MOESM1_ESM.pdf/9681044)

# HC in the blood (during and post H2 inhalation)

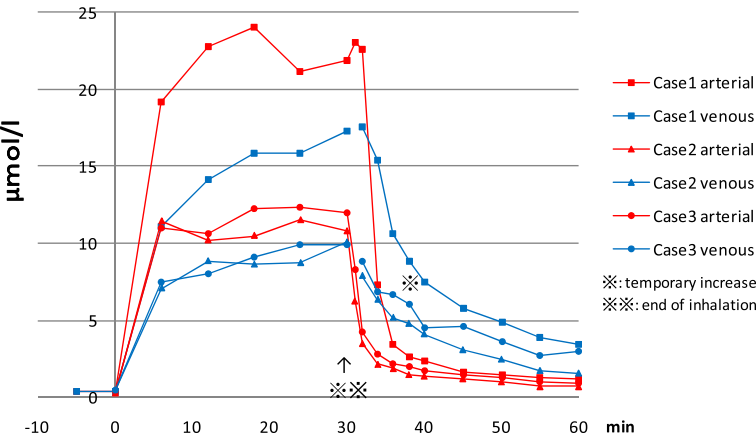

Supplement: MOESM1 [file 9681044]
